# Supplementary material for: Preparing for a Bsal invasion into North America has improved multi-sector readiness
Source: Frontiers journal article supplement (doi:10.3389/famrs.2024.1347541), 2024-03-06
Supplement: Data_Sheet_1.docx [file Data_Sheet_1.docx]

**Supplemental Material for**

**Preparing for a *Bsal* invasion into North America has improved multi-sector readiness**

Deanna H. Olson1*, Evan H. Campbell Grant2, Molly Bletz2,3, Jonah Piovia-Scott4, David Lesbarrères5, Jacob L. Kerby6, Michael J. Adams7, Maria Florencia Breitman8, Michelle R. Christman9, María J. Forzán10, Matthew J. Gray11, Aubree J. Hill12, Michelle S. Koo13, Olga Milenkaya14, Eria A. Rebollar15, Louise A. Rollins-Smith16, Megan Serr17, Alexander Shepack18, Leonard Shirose19, Laura Sprague20, Jenifer B. Walke21, Alexa R. Warwick22 and Brittany A. Mosher23

1Pacific Northwest Research Station, Forest Service (USDA), Corvallis, OR, United States, 2U.S.

Geological Survey, Eastern Ecological Research Center/Patuxent Wildlife Research Center, Turners Falls, MS, United States, 3Department of Biology, University of Massachusetts Amherst, Amherst, MA, United States, 4School of Biological Sciences, Washington State University Vancouver, Vancouver, WA, United States, 5Environment and Climate Change Canada (ECCC), Ottawa, ON, Canada, 6Biology Department, University of South Dakota, Vermillion, SD, United States, 7Forest and Rangeland Ecosystem Science Center, U.S. Geological Survey (USGS), Corvallis, OR, United States, 8Department of Biology and Environmental Science, Auburn University at Montgomery, Montgomery, AL, United States, 9National Wildlife Refuge System, United States Fish and Wildlife Service (USFWS), Washington, DC, United States, 10College of Veterinary Medicine, Long Island University, Brookville, NY, United States, 11School of Natural Resources, The University of Tennessee, Knoxville, Knoxville, TN, United States, 12Department of Biology, Tennessee Technological University, Cookeville, TN, United States, 13Museum of Vertebrate Zoology, University of California, Berkeley, Berkeley, CA, United States,

14Conservation Biology Program, Warren Wilson College, Swannanoa, NC, United States, 15Faculty of Higher Studies Zaragoza (Facultad de estudios superiores Zaragoza), National Autonomous University of Mexico, México City, Mexico, 16School of Medicine, Vanderbilt University, Nashville, TN, United States, 17Department of Biology, Meredith College, Raleigh, NC, United States, 18Department of Biological Sciences, Florida International University, Miami, FL, United States, 19Canadian Wildlife Health Cooperative, Department of Pathobiology, University of Guelph, Guelph, ON, Canada, 20Pacific Region Fish Health Program, U.S. Fish and Wildlife Service (USFWS), Orofino, ID, United States, 21Department of Biology, Eastern Washington University, Cheney, WA, United States, 22Department of Fisheries and Wildlife, Michigan State University, East Lansing, MI, United States, 23Rubenstein School of

Environment and Natural Resources, University of Vermont, Burlington, VT, United States

Any use of trade, product, or firm names is for descriptive purposes only and does not imply endorsement by the U.S. Government.

Front. Amphib. Reptile Sci. 2:1347541

**Olson et al. Supplementary Materials**

**Amphibian Species Susceptibility to *Batrachochytrium salamandrivorans* Based on Laboratory-Exposure Experiments**

A review of the literature was conducted to compile amphibian species that have been tested for susceptibility to *Batrachochytrium salamandrivorans* (*Bsal*) infection, and the subset of those with *Bsal*-chytridiomycosis mortality (Supplementary Materials Table 1, attached file). Table 1 metadata are included below, with study references.

Each row of Supplementary Materials Table 1 represents a unique experiment on a particular life stage of a particular species. Field names in the list below correspond to columns of Supplementary Materials Table 1. Table format is adapted from Castro-Monzon et al. (2022).

| **Field name** | **Description** |
| --- | --- |
| reference1 | Short citation; see below for bibliography with full citation information. |
| pubyear | Publication year. |
| r_genus | Genus of the species “as reported” in the source paper. |
| r_species | Species name “as reported” in the source paper. |
| order | Order of the species as per Amphibian Species of the World database. |
| family | Family of the species as per Amphibian Species of the World database. |
| subfamily | Subfamily of the species as per Amphibian Species of the World database. |
| genus | Genus of the species as per Amphibian Species of the World database. |
| species | Species as per Amphibian Species of the World database. |
| iucn2 | IUCN Red List conservation status. |
| NA_pres3 | Presence in North America2 (native, introduced, absent_rare). |
| US_import4 | Is the species commonly imported into the United States? (yes or no) |
| Lifestage | Life stage used in experiment (larva, juvenile5, adult) |
| Bsal_infection | Were any exposed amphibians infected with Bsal? (yes or no) |
| Bsal_mortality | Were any *Bsal*-related deaths reported? (yes or no) |

1When the same experimental results are presented in multiple papers, we listed the results under the reference in which results on both Bsal infection and mortality were first reported.

2LC = least concern; NT = near threatened; VU = vulnerable; EN = endangered; CR = critically endangered; DD = data deficient.

3Occurrence data from AmphibiaWeb (amphibiaweb.org).

4Commonly traded means >100 individuals are imported into the United States per year as reported in the U.S. Fish and Wildlife Service’s LEMIS (Law Enforcement Management Information System) database between 2016 and 2021 (LEMIS data from Connelly et al. 2023).

5Juveniles are defined as animals <1 year old; animals >1 year old are considered adults.

**Supplementary Materials: Literature Cited**

Barnhart, K., Bletz, M.C., LaBumbard, B., Tokash-Peters, A., Gabor, C.R., Woodhams, D.C. (2020). *Batrachochytrium salamandrivorans* elicits acute stress response in spotted salamanders but not infection or mortality. Anim. Conserv. 23, 533–546.

Bates, K.A., Shelton, J.M.G., Mercier, V.L., Hopkins, K.P., Harrison, X.A., Petrovan, S.O., Fisher, M.C. (2019). Captivity and infection by the fungal pathogen *Batrachochytrium salamandrivorans* perturb the amphibian skin microbiome. Front. Microbiol. 10, 1834.

Beukema, W., Pasmans, F., Van Praet, S., Ferri-Yáñez, F., Kelly, M., Laking, A.E., et al. (2021). Microclimate limits thermal behaviour favourable to disease control in a nocturnal amphibian. Ecol. Lett. 24, 27–37.

Blooi, M., Pasmans, F., Rouffaer, L., Haesebrouck, F., Vercammen, F., Martel, A. (2015). Successful treatment of *Batrachochytrium salamandrivorans* infections in salamanders requires synergy between voriconazole, polymyxin E and temperature. Sci. Rep.–UK 5, 11788.

Bosch, J., Martel, A., Sopniewski, J., Thumsová, B., Ayres, C., Scheele, B.C., Velo-Antón, G., Pasmans, F. (2021). *Batrachochytrium salamandrivorans* threat to the Iberian urodele hotspot. Journal of Fungi 7, 644.

Carter, E.D., Bletz, M.C., Sage, M.L., LaBumbard, B., Rollins-Smith, L.A., Woodhams, D.C., et al. (2021). Winter is coming – temperature affects immune defenses and susceptibility to *Batrachochytrium salamandrivorans*. PLoS Pathog. 17, e1009234.

Carter, E.D., Miller, D.L., Peterson, A.C., Sutton, W.B., Cusaac, J.P.W., Spatz, J.A., et al. 2020. Conservation risk of *Batrachochytrium salamandrivorans* to endemic lungless salamanders. Conserv. Lett. 13, e12675.

Castro Monzon, F., Rödel, M.-O., Ruland, F., Parra-Olea, G., Jeschke, J.M. (2022). *Batrachochytrium salamandrivorans*’ amphibian host species and invasion range. EcoHealth 19, 475–486.

Connelly, P.J., Ross, N., Stringham, O.C., Eskew, E.A. (2023). United States amphibian imports pose a disease risk to salamanders despite Lacey Act regulations. Nat. Commun. Earth Environ. 4,art 351.

DiRenzo, G.V., Longo, A.V., Muletz-Wolz, C.R., Pessier, A.P., Goodheart, J.A., Lips, K.R. (2021). Plethodontid salamanders show variable disease dynamics in response to *Batrachochytrium salamandrivorans* chytridiomycosis. Biol. Invas. 23, 2797–2815.

Friday, B., Holzheuser, C., Lips, K.R., Longo, A.V. (2020). Preparing for invasion: assessing risk of infection by chytrid fungi in southeastern plethodontid salamanders. J. Exper. Zool. A: Ecol. Integrat. Physiol. 333:829–840.

Gray, M.J., Carter, E.D., Piovia-Scott, J., Cusaac, J.P.W., Peterson, A.C., Whetstone, R.D., et al. (2023). Broad host susceptibility of North American amphibian species to *Batrachochytrium salamandrivorans* suggests high invasion potential and biodiversity risk. Nat. Commun. 14, 3270.

Greener, M.S., Verbrugghe, E., Kelly, M., Blooi, M., Beukema, W., Canessa, S., et al. (2020). Presence of low virulence chytrid fungi could protect European amphibians from more deadly strains. Nat. Commun. 11, 5393.

Kumar, R., Malagon, D.A., Carter, E.D., Miller, D.L., Bohanon, M.L., Cusaac, J.P.W., et al. (2020). Experimental methodologies can affect pathogenicity of *Batrachochytrium salamandrivorans* infections. PLoS ONE 15, e0235370.

Li, Z., Martel, A., Bogaerts, S., Göçmen, B., Pafilis, P., Lymberakis, P., et al. (2020a). Landscape connectivity limits the predicted impact of fungal pathogen invasion. J. Fungi 6(4), 205.

Li, Z., Verbrugghe, E., Konstanjšek, R., Lukač, M., Pasmans, F., Cizelj, I., Martel, A. (2020b). Dampened virulence and limited proliferation of *Batrachochytrium salamandrivorans* during subclinical infection of the troglobiont olm (*Proteus anguinus*). Sci. Rep.–UK 10, 16480.

Longo, A.V., Fleischer, R.C., Lips, K.R. (2019). Double trouble: co-infections of chytrid fungi will severely impact widely distributed newts. Biol. Invasions 21, 2233–2245.

Malagon, D.A., Melara, L.A., Prosper, O.F., Lenhart, S., Carter, E.D., Fordyce, J.A., et al. (2020). Host density and habitat structure influence host contact rates and *Batrachochytrium salamandrivorans* transmission. Sci. Rep.–UK 10, 5584.

Martel, A., Blooi, M., Adriaensen, C., Rooij, P.V., Beukema, W., Fisher, M.C., et al. (2014). Recent introduction of a chytrid fungus endangers Western Palearctic salamanders. Science 346, 630–631.

Martel, A., Spitzen-van der Sluijs, A., Blooi, M., Bert, W., Ducatelle, R., Fisher, M.C., et al. (2013). *Batrachochytrium salamandrivorans* sp. nov. causes lethal chytridiomycosis in amphibians. P. Natl. Acad. Sci. USA 110, 15325–15329.

Martel, A., Vila-Escale, M., Fernández-Giberteau, D., Martinez-Silvestre, A., Canessa, S., Van Praet, S., et al. (2020). Integral chain management of wildlife diseases. Conserv. Lett. 13, e12707.

Ossiboff, R.J., Towe, A.E., Brown, M.A., Longo, A.V., Lips, K.R., Miller, D.L., et al. (2019). Differentiating *Batrachochytrium dendrobatidis* and *B. salamandrivorans* in amphibian chytridiomycosis using RNAScope®in situ hybridization. Front. Vet. Sci. 6, 304.

Spitzen-van der Sluijs, A., Stegen, G., Bogaerts, S., Canessa, S., Steinfartz, S., Janssen, N., et al. (2018). Post-epizootic salamander persistence in a disease-free refugium suggests poor dispersal ability of *Batrachochytrium salamandrivorans*. Sci. Rep–UK 8, 3800.

Stegen, G., Pasmans, F., Schmidt, B.R., Rouffaer, L.O., Van Praet, S., Schaub, M., et al. (2017). Drivers of salamander extirpation mediated by *Batrachochytrium salamandrivorans*. Nature 544, 353–356.

Tavarez-Jimenez, E.J., Bletz, M.C., Piovia-Scott, J., Draculan, M.; Horan, S., McCartney, J.A., Woodhams, D.C. 2022. Commonly traded amphibians are suscveptible to the emerging fungal pathogen *Batrachochytrium salamandrivorans*. P. 119 in GARD: First Global Amphibian and Reptile Disease Conference, Knoxville, TN, USA, 4-10 August 2022: Book of Abstracts. <https://az659834.vo.msecnd.net/eventsairsthcusprod/production-utconferences-public/e86b91e30be542f89e75af8298f9bda6>; accessed 16 November 2023.

Towe, A.E., Gray, M.J., Carter, E.D., Wilber, M.Q., Ossiboff, R.J., Ash, K., et al. 2021. *Batrachochytrium salamandrivorans* can devour more than salamanders. J. Wildlife Dis. 57, 942–948.

Wilber, M.Q., Carter, E.D., Gray, M.J., Briggs, C.J. (2021). Putative resistance and tolerance mechanisms have little impact on disease progression for an emerging salamander pathogen. Funct. Ecol. 35, 847–859.
